# Supplementary material
Source: Springer Nature journal article supplement (https://www.springermedizin.de/resource/supplementary/12967_2012_1368_MOESM1_ESM.pdf/9573466)

Baseline

+3

+6

+11

+21 months

During  
tremelimumab  
infusions

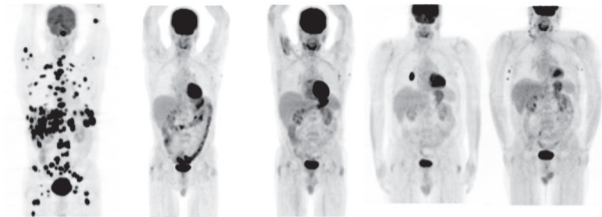

+29

+32

+34

+37

+42 months

Post-  
tremelimumab

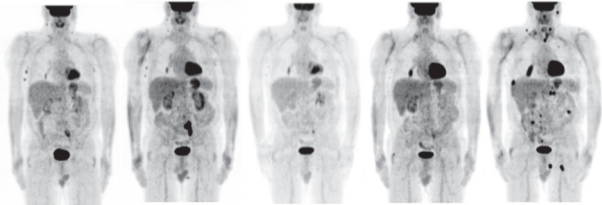

Supplement: MOESM1 [file 9573466]
